# Supplementary material for: QTL mapping for plant height and ear height using bi-parental immortalized heterozygous populations in maize
Source: Front Plant Sci. 2024 Mar 25;15:1371394. doi: 10.3389/fpls.2024.1371394 (PMC10999566; doi:10.3389/fpls.2024.1371394)
Supplement: Supplementary file 5 [file Table_3.xlsx]

## Sheet: Sheet4
Source QTL	SNP	P	Genes v4 ID (Consequence Types)	REF
qPH1-1	chr1:148688773	1.26E-4	Zm00001d030614 (synonymous_variant)Zm00001d030614 (downstream_gene_variant)	Peiffer J A, Romay M C, Gore M A, et al. The genetic architecture of maize height[J]. Genetics, 2014, 196(4): 1337-1356.
	chr1:148689460	1.04E-4	Zm00001d030614 (upstream_gene_variant)Zm00001d030614 (intron_variant)
qPH1-2	chr1:281041016	1.43E-4	Zm00001d034006 (downstream_gene_variant)Zm00001d034007 (synonymous_variant)Zm00001d034008 (upstream_gene_variant)
	chr1:281223083	5.97E-9	Zm00001d034015 (upstream_gene_variant)
	chr1:281764357	8.26E-5	Zm00001d034034 (downstream_gene_variant)Zm00001d034035 (5_prime_UTR_variant)Zm00001d034035 (synonymous_variant)
	chr1:281965004	4.47E-11	Zm00001d034036 (5_prime_UTR_variant)Zm00001d034036 (intron_variant)
	chr1:283085614	2.96E-10	Zm00001d034069 (downstream_gene_variant)Zm00001d034070 (downstream_gene_variant)
	chr1:283165184	1.18E-10	Zm00001d034072 (downstream_gene_variant)
	chr1:283954004	5.23E-6	Zm00001d034096 (upstream_gene_variant)
	chr1:283954022	5.23E-6	Zm00001d034096 (upstream_gene_variant)
qPH2-2	chr2:214091115	2.92E-7	Zm00001d006677 (upstream_gene_variant)
qPH3	chr3:144358327	3.38E-5	Zm00001d041935 (synonymous_variant)
qPH8-6	chr8:135101406	8.24E-10	Zm00001d010961 (synonymous_variant)
	chr8:136180551	9.25E-7	Zm00001d010997 (downstream_gene_variant)Zm00001d010995 (intron_variant)
	chr8:136181981	4.3E-5	Zm00001d010997 (synonymous_variant)Zm00001d010995 (downstream_gene_variant)
	chr8:136349315	4.51E-5	Zm00001d011001 (5_prime_UTR_variant)Zm00001d011000 (upstream_gene_variant)Zm00001d011002 (downstream_gene_variant)
	chr8:136857944	3.75E-6	Zm00001d011016 (downstream_gene_variant)Zm00001d011014 (upstream_gene_variant)Zm00001d011013 (synonymous_variant)
	chr8:139412045	3.16E-5	Zm00001d011119 (downstream_gene_variant)Zm00001d011117 (downstream_gene_variant)Zm00001d011118 (missense_variant)
	chr8:140009344	1.52E-4	Zm00001d011132 (missense_variant)Zm00001d011133 (downstream_gene_variant)
	chr8:141577755	2.42E-7	Zm00001d011167 (upstream_gene_variant)
	chr8:141805506	5.8E-5	Zm00001d011174 (missense_variant)Zm00001d011174 (5_prime_UTR_variant)
qPH10-1	chr10:7550432	3.91E-13	Zm00001d023503 (intron_variant)
qPH1-2	chr1:283899160	2.57E-12	Zm00001d034095 (downstream_gene_variant)	Pan Q, Xu Y, Li K, et al. The genetic basis of plant architecture in 10 maize recombinant inbred line populations[J]. Plant physiology, 2017, 175(2): 858-873.
qPH3	chr3:148150360	5.43E-5	Zm00001d042039 (upstream_gene_variant)Zm00001d042040 (downstream_gene_variant)	Cruz Jimenez-Galindo J, Ana Malvar R, Butron A, et al. Mapping of resistance to corn borers in a MAGIC population of maize[J]. BMC PLANT BIOLOGY, 2019, 19(1).
	chr3:148150361	5.43E-5	Zm00001d042039 (upstream_gene_variant)Zm00001d042040 (downstream_gene_variant)
	chr3:148152999	9.01E-5	Zm00001d042039 (upstream_gene_variant)Zm00001d042040 (synonymous_variant)
	chr3:148153001	8.35E-5	Zm00001d042039 (upstream_gene_variant)Zm00001d042040 (missense_variant)
qPH7-2	chr7:165800701	3.28E-7	Zm00001d021910 (upstream_gene_variant)Zm00001d021912 (synonymous_variant)	Sadessa K, Beyene Y, Ifie B E, et al. Identification of genomic regions associated with agronomic and disease resistance traits in a large set of multiple DH populations[J]. Genes, 2022, 13(2): 351.
